# Supplementary material
Source: PubMed Central journal article supplement (PMC4323891)
Supplement: NIHMS634343-supplement-01.pdf [file NIHMS634343-supplement-01.pdf]

**Supplemental Information for:**

**Erlotinib-induced skin inflammation is IL-1 mediated in KC-Tie2 mice and human skin organ culture**

Nicole L. Ward<sup>1\*\$</sup>, Narasimharao Bhagathavula<sup>2\*</sup>, Andrew Johnston<sup>3\*</sup>, Sean M. Dawes<sup>1</sup>, Wen Fu<sup>1</sup>, Sylviane Lambert<sup>3</sup>,  
Michael K. Dame<sup>2</sup>, Roscoe L. Warner<sup>2</sup>, Johann E. Gudjonsson<sup>3</sup>, James Varani<sup>2</sup>, and James T. Elder<sup>3,4,\$</sup>

<sup>1</sup> Department of Dermatology, Case Western Reserve University, Cleveland, OH

<sup>2</sup> Department of Pathology, University of Michigan, Ann Arbor, MI

<sup>3</sup> Department of Dermatology, University of Michigan, Ann Arbor, MI

<sup>4</sup> Ann Arbor Veterans Affairs Hospital, Ann Arbor, MI

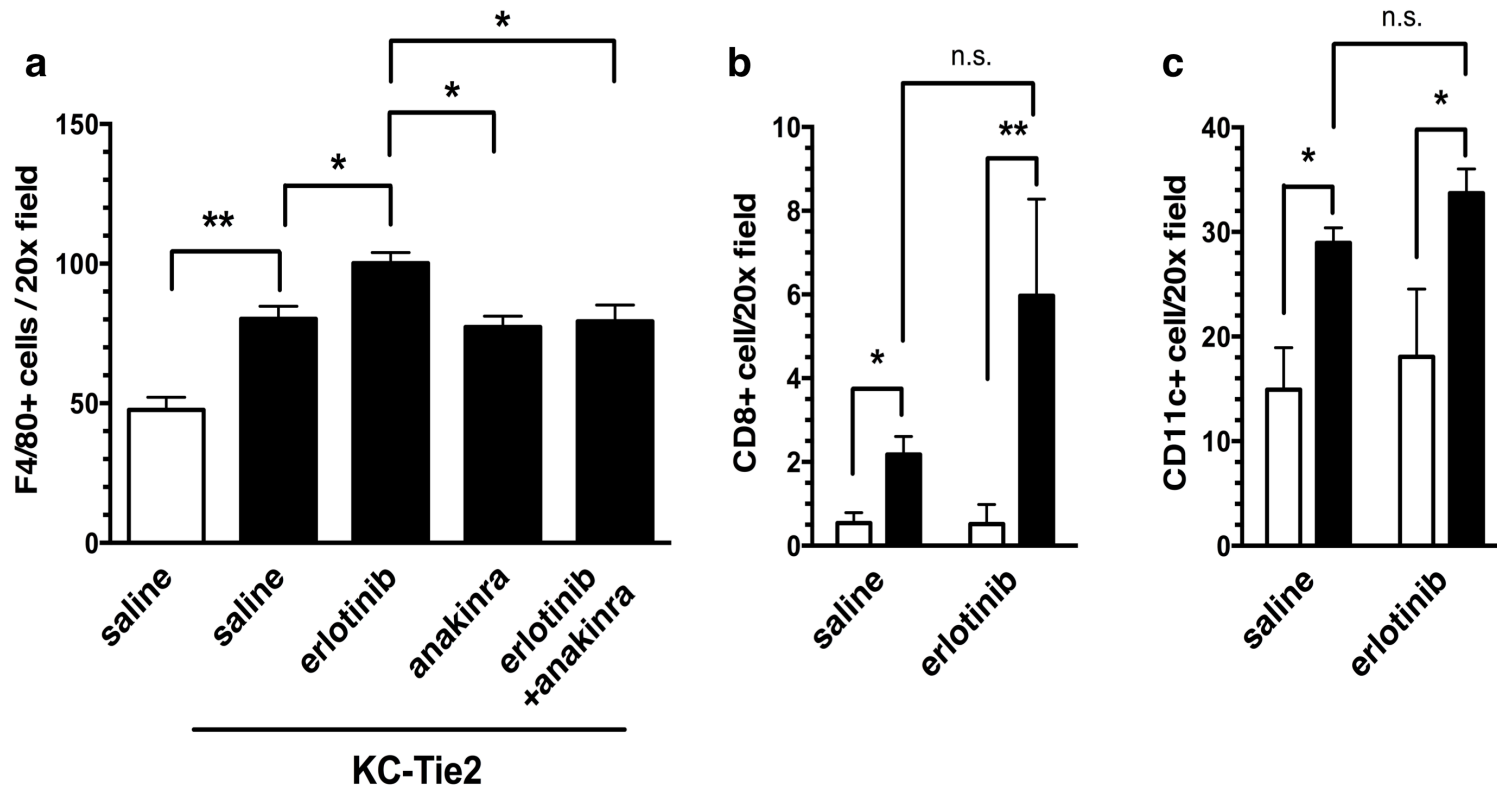

**Figure S1.** Effects of erlotinib on F4/80<sup>+</sup> macrophages (a), CD8<sup>+</sup> T-cells (b), and CD11c<sup>+</sup> dendritic cells (c) in KC-Tie2 mice and control littermate skin. Open columns, control littermates. Black columns, KC-Tie2 mice. Bars, mean + SEM, n = 4-12. \* indicates  $p < 0.05$ , n.s. indicates not significant, by two-tailed unpaired multiple t tests with unequal variances and Holm-Sidak correction for multiple comparisons.

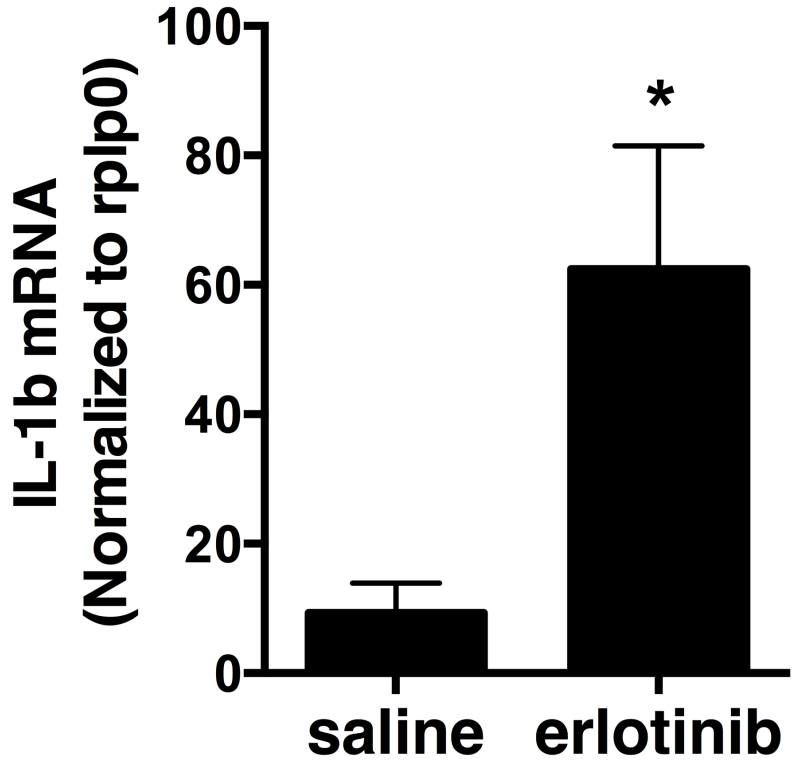

**Figure S2.** IL-1b mRNA expression increases in skin of KC-Tie2 mice treated with erlotinib. IL-1b mRNA expression values in KC-Tie2 mice treated with either saline or erlotinib, normalized to RPLP0. Statistical significance indicated by \*  $p < 0.05$ .
